# Supplementary material
Source: PubMed Central journal article supplement (PMC6724728)
Supplement: NIHMS1512954-supplement-1.pdf [file NIHMS1512954-supplement-1.pdf]

**Table S1.** Amino acid properties, domain organization, and ascribed biological functions of proteins that form de novo nuclear bodies when tagged with YFP and overexpressed in HEK293 cells. Related to Figure 4D.

| Gene Name | Length (AAs, w/o YFP) | Function                                 | FCR   | NCPR   | Hydropathy | Disorder | Domains/Motifs (Uniprot)  |
|-----------|-----------------------|------------------------------------------|-------|--------|------------|----------|---------------------------|
| CCNT1     | 726                   | P-TEFb complex, transcription elongation | 0.213 | 0.012  | 3.798      | 0.697    | Coiled-coil               |
| HSF1      | 529                   | Stress-inducible transcription factor    | 0.216 | -0.042 | 4.113      | 0.681    | TAD, DNA-binding domain   |
| MLLT3     | 568                   | Super elongation complex, transcription  | 0.305 | 0.012  | 3.477      | 0.739    | YEATS                     |
| RNPS1     | 305                   | Splicing, exon junction complex          | 0.354 | 0.177  | 2.931      | 0.849    | RRM                       |
| SART1     | 800                   | mRNA processing and splicing             | 0.385 | -0.013 | 3.416      | 0.751    | Coiled-coil (2)           |
| TAF15     | 592                   | Splicing, RNA-binding, transcription     | 0.24  | 0.003  | 2.978      | 0.792    | Zinc-finger, RRM, RGG box |

FCR: Fraction of charged residues; NCPR: Net charge per residue
